# Supplementary material
Source: ML conference proceedings conference paper supplement (https://proceedings.neurips.cc/paper_files/paper/2014/hash/da4fb5c6e93e74d3df8527599fa62642-Abstract.html)
Supplement: Supplementary file 2 [file da4fb5c6e93e74d3df8527599fa62642-Supplemental.zip]

## A Technical Proofs Related to Computational Algorithm

### A.1 Proof of Theorem 2.2

*Proof.* We consider the following decomposition

$$\begin{aligned} & \| \mathbf{Y} - \mathbf{XB}^{(t)} \|_{2,1} + \lambda \| \mathbf{B}^{(t)} \|_{1,p} - \| \mathbf{Y} - \mathbf{X}\hat{\mathbf{B}} \|_{2,1} - \lambda \| \hat{\mathbf{B}} \|_{1,p} = \| \mathbf{Y} - \mathbf{XB}^{(t)} \|_{2,1} + \lambda \| \mathbf{B}^{(t)} \|_{1,p} \\ & - \| \mathbf{Y} - \mathbf{X}\tilde{\mathbf{B}} \|_{\mu} - \lambda \| \tilde{\mathbf{B}} \|_{1,p} + \| \mathbf{Y} - \mathbf{X}\tilde{\mathbf{B}} \|_{\mu} + \lambda \| \tilde{\mathbf{B}} \|_{1,p} - \| \mathbf{Y} - \mathbf{X}\hat{\mathbf{B}} \|_{2,1} - \lambda \| \hat{\mathbf{B}} \|_{1,p}. \end{aligned} \quad (\text{A.1})$$

By (2.6), we have

$$\| \mathbf{Y} - \mathbf{XB}^{(t)} \|_{2,1} \leq \frac{m\mu}{2} + \| \mathbf{Y} - \mathbf{XB}^{(t)} \|_{\mu} \quad \text{and} \quad \| \mathbf{Y} - \mathbf{X}\hat{\mathbf{B}} \|_{2,1} \geq \| \mathbf{Y} - \mathbf{X}\hat{\mathbf{B}} \|_{\mu}. \quad (\text{A.2})$$

Combining (A.1) and (A.2), we have

$$\begin{aligned} & \| \mathbf{Y} - \mathbf{XB}^{(t)} \|_{2,1} + \lambda \| \mathbf{B}^{(t)} \|_{1,p} - \| \mathbf{Y} - \mathbf{X}\hat{\mathbf{B}} \|_{2,1} - \lambda \| \hat{\mathbf{B}} \|_{1,p} \\ & \leq \frac{m\mu}{2} + \| \mathbf{Y} - \mathbf{XB}^{(t)} \|_{\mu} + \lambda \| \mathbf{B}^{(t)} \|_{1,p} - \| \mathbf{Y} - \mathbf{X}\tilde{\mathbf{B}} \|_{\mu} - \lambda \| \tilde{\mathbf{B}} \|_{1,p} \\ & \quad + \| \mathbf{Y} - \mathbf{X}\tilde{\mathbf{B}} \|_{\mu} + \lambda \| \tilde{\mathbf{B}} \|_{1,p} - \| \mathbf{Y} - \mathbf{X}\hat{\mathbf{B}} \|_{\mu} - \lambda \| \hat{\mathbf{B}} \|_{1,p}. \end{aligned} \quad (\text{A.3})$$

Since  $\tilde{\mathbf{B}}$  is the minimizer of (2.8), we have

$$\| \mathbf{Y} - \mathbf{X}\tilde{\mathbf{B}} \|_{\mu} + \lambda \| \tilde{\mathbf{B}} \|_{1,p} \leq \| \mathbf{Y} - \mathbf{X}\hat{\mathbf{B}} \|_{\mu} + \lambda \| \hat{\mathbf{B}} \|_{1,p}. \quad (\text{A.4})$$

By Theorem 5.1 in [4], we have

$$\| \mathbf{Y} - \mathbf{XB}^{(t)} \|_{\mu} + \lambda \| \mathbf{B}^{(t)} \|_{1,p} - \| \mathbf{Y} - \mathbf{X}\tilde{\mathbf{B}} \|_{\mu} - \lambda \| \tilde{\mathbf{B}} \|_{1,p} \leq \frac{2\gamma \| \mathbf{B}^{(0)} - \tilde{\mathbf{B}} \|_{\text{F}}^2}{\mu(t+1)^2}. \quad (\text{A.5})$$

Note that (A.5) implies that given a pre-specified accuracy  $\epsilon$ , after

$$t = \| \mathbf{B}^{(0)} - \tilde{\mathbf{B}} \|_{\text{F}} \sqrt{2\gamma} / \sqrt{\mu\epsilon} - 1 = \mathcal{O}(1/\sqrt{\mu\epsilon}) \quad (\text{A.6})$$

iterations, we have  $\| \mathbf{Y} - \mathbf{XB}^{(t)} \|_{\mu} + \lambda \| \mathbf{B}^{(t)} \|_{1,p} - \| \mathbf{Y} - \mathbf{X}\tilde{\mathbf{B}} \|_{\mu} - \lambda \| \tilde{\mathbf{B}} \|_{1,p} \leq \epsilon$ . By combining (A.3), (A.4) and (A.5), we have

$$\| \mathbf{Y} - \mathbf{XB}^{(t)} \|_{2,1} + \lambda \| \mathbf{B}^{(t)} \|_{1,p} - \| \mathbf{Y} - \mathbf{X}\hat{\mathbf{B}} \|_{2,1} - \lambda \| \hat{\mathbf{B}} \|_{1,p} \leq \frac{m\mu}{2} + \frac{2\gamma \| \mathbf{B}^{(0)} - \tilde{\mathbf{B}} \|_{\text{F}}^2}{\mu(t+1)^2}. \quad (\text{A.7})$$

Since  $\mu = \epsilon/2m$ , to make L.H.S. of (A.7) no smaller than  $\epsilon$ , we need

$$\frac{2m\gamma \| \mathbf{B}^{(0)} - \tilde{\mathbf{B}} \|_{\text{F}}^2}{\epsilon(t+1)^2} \leq \frac{\epsilon}{2}.$$

By solving the inequality above, we obtain

$$t \geq \frac{2\sqrt{m\gamma} \| \mathbf{B}^{(0)} - \tilde{\mathbf{B}} \|_{\text{F}}}{\epsilon} - 1,$$

which completes the proof.  $\square$

### A.2 ADMM Solver for CMR

We give a brief derivation of the alternating direction method of multipliers (ADMM) for solving CMR. We first reparametrize (2.1) as follows,

$$(\hat{\mathbf{B}}, \hat{\mathbf{R}}) = \underset{\mathbf{B}, \mathbf{R}}{\operatorname{argmin}} \quad \| \mathbf{R} \|_{2,1} + \lambda \| \mathbf{B} \|_{1,p} \quad \text{subject to: } \mathbf{Y} - \mathbf{XB} = \mathbf{R}.$$

Then for  $t = 1, 2, \dots$ , ADMM adopts the iterative scheme

$$\mathbf{B}^{(t)} = \underset{\mathbf{B}}{\operatorname{argmin}} \quad \frac{\lambda}{\rho} \| \mathbf{B} \|_{1,p} + \frac{1}{2} \| \mathbf{U}^{(t-1)} / \rho + \mathbf{Y} - \mathbf{R}^{(t-1)} - \mathbf{XB} \|_{\text{F}}^2, \quad (\text{A.8})$$

$$\mathbf{R}^{(t)} = \underset{\mathbf{R}}{\operatorname{argmin}} \quad \frac{1}{\rho} \| \mathbf{R} \|_{2,1} + \frac{1}{2} \| \mathbf{U}^{(t-1)} / \rho + \mathbf{Y} - \mathbf{R} - \mathbf{XB}^{(t)} \|_{\text{F}}^2, \quad (\text{A.9})$$

$$\mathbf{U}^{(t)} = \mathbf{U}^{(t-1)} + \rho \left( \mathbf{Y} - \mathbf{R}^{(t)} - \mathbf{XB}^{(t)} \right). \quad (\text{A.10})$$

where  $\rho$  is a penalty parameter and  $\mathbf{U}$  is the Lagrange multiplier matrix. The algorithm stops when

$$\max \left\{ \|\mathbf{B}^{(t)} - \mathbf{B}^{(t-1)}\|_F, \|\mathbf{R}^{(t)} - \mathbf{R}^{(t-1)}\|_F, \|\mathbf{U}^{(t)} - \mathbf{U}^{(t-1)}\|_F \right\} \leq \varepsilon,$$

where  $\varepsilon$  is the stopping precision. By adopting the group soft thresholding procedure, (A.9) has a closed form solution as follows,

$$\mathbf{R}_{*k}^{(t)} = \tilde{\mathbf{R}}_{*k}^{(t)} \cdot \max\{1 - 1/(\rho\|\tilde{\mathbf{R}}_{*k}\|_2), 0\},$$

where  $\tilde{\mathbf{R}} = \mathbf{U}^{(t-1)}/\rho + \mathbf{Y} - \mathbf{X}\mathbf{B}^{(t)}$ . There are multiple choices to solve (A.8). Let  $\tilde{\mathbf{Y}} = \mathbf{U}^{(t-1)}/\rho + \mathbf{Y} - \mathbf{R}^{(t-1)}$ , then (A.8) can be rewritten as

$$\mathbf{B}^{(t)} = \underset{\mathbf{B}}{\operatorname{argmin}} \frac{1}{2} \|\tilde{\mathbf{Y}} - \mathbf{X}\mathbf{B}\|_F^2 + \frac{\lambda}{\rho} \|\mathbf{B}\|_{1,p}. \quad (\text{A.11})$$

(A.11) is equivalent to (1.1) in the sense of optimization, therefore it can also be solved by existing OMR solvers. While a more efficient alternative is to approximately solve (A.8) using a linearization step at  $\mathbf{B} = \mathbf{B}^{(t-1)}$  as follows,

$$\mathbf{B}^{(t)} = \underset{\mathbf{B}}{\operatorname{argmin}} \frac{\lambda}{\rho} \|\mathbf{B}\|_{1,p} + \frac{1}{2\eta} \|\mathbf{B} - \tilde{\mathbf{B}}\|_F^2, \quad (\text{A.12})$$

where  $\tilde{\mathbf{B}} = \mathbf{B}^{t-1} - \eta(\mathbf{X}^T \mathbf{X} \mathbf{B}^{t-1} - \tilde{\mathbf{Y}}^T \mathbf{X})$  and  $\eta$  is a positive constant such that

$$\frac{1}{2} \|\tilde{\mathbf{Y}} - \mathbf{X}\mathbf{B}^{(t)}\|_F^2 \leq \frac{1}{2} \|\tilde{\mathbf{Y}} - \mathbf{X}\mathbf{B}^{(t-1)}\|_F^2 + \langle \mathbf{X}^T \mathbf{X} \mathbf{B}^{t-1} - \tilde{\mathbf{Y}}^T \mathbf{X}, \mathbf{B}^{(t)} - \mathbf{B}^{(t-1)} \rangle + \frac{1}{2\eta} \|\mathbf{B}^{(t)} - \mathbf{B}^{(t-1)}\|_F^2.$$

A conservative choice is  $\eta = 1/\|\mathbf{X}\|_2^2$ , and we can improve the empirical performance by the backtracking line search as is shown in Section 3. When  $p = 2$ , we can obtain the closed form solution to (A.12) by the group soft thresholding procedure

$$\mathbf{B}_{j*}^{(t)} = \tilde{\mathbf{B}}_{j*} \cdot \max\{1 - \eta\lambda/(\rho\|\tilde{\mathbf{B}}_{j*}\|_2), 0\}.$$

More details about other choices of  $p$  can be found in [11, 12].

## B Technical Proofs Related to Statistical Properties

Note that the following two relations are frequently used in our analysis,

$$\mathbf{Y} - \mathbf{X}\mathbf{B}^0 = \mathbf{X}\mathbf{B}^0 + \mathbf{Z} - \mathbf{X}\mathbf{B}^0 = \mathbf{Z} \quad \text{and} \quad \mathbf{Y} - \mathbf{X}\hat{\mathbf{B}} = \mathbf{X}\mathbf{B}^0 + \mathbf{Z} - \mathbf{X}\hat{\mathbf{B}} = \mathbf{Z} - \mathbf{X}\hat{\Delta}.$$

We then present the proof of the main theorem.

### B.1 Proof of Lemma 3.1

*Proof.* By triangle inequality, we have

$$\begin{aligned} \|\hat{\mathbf{B}}\|_{1,p} &= \|\mathbf{B}^0 + \hat{\Delta}\|_{1,p} = \|\mathbf{B}_S^0 + \mathbf{B}_{\mathcal{N}}^0 + \hat{\Delta}_S + \hat{\Delta}_{\mathcal{N}}\|_{1,p} \\ &\geq \|\mathbf{B}_S^0 + \hat{\Delta}_{\mathcal{N}}\|_{1,p} - \|\mathbf{B}_{\mathcal{N}}^0 + \hat{\Delta}_S\|_{1,p} \geq \|\mathbf{B}_S^0\|_{1,p} + \|\hat{\Delta}_{\mathcal{N}}\|_{1,p} - \|\mathbf{B}_{\mathcal{N}}^0\|_{1,p} - \|\hat{\Delta}_S\|_{1,p}. \end{aligned} \quad (\text{B.1})$$

Since  $\mathbf{B}^0 \in \mathcal{S}$ , we have  $\|\mathbf{B}_{\mathcal{N}}^0\|_{1,p} = 0$ , and  $\|\mathbf{B}^0\|_{1,p} = \|\mathbf{B}_S^0\|_{1,p} + \|\mathbf{B}_{\mathcal{N}}^0\|_{1,p} = \|\mathbf{B}_S^0\|_{1,p}$ . By rearranging (B.1), we obtain

$$\|\mathbf{B}^0\|_{1,p} - \|\mathbf{B}^0 + \hat{\Delta}\|_{1,p} \leq \|\hat{\Delta}_S\|_{1,p} - \|\hat{\Delta}_{\mathcal{N}}\|_{1,p}. \quad (\text{B.2})$$

Since  $\hat{\mathbf{B}}$  is the minimizer to (2.1), by (B.2), we further have

$$\|\mathbf{X}\hat{\Delta} - \mathbf{Z}\|_{2,1} - \|\mathbf{Z}\|_{2,1} \leq \lambda(\|\mathbf{B}^0\|_{1,p} - \|\mathbf{B}^0 + \hat{\Delta}\|_{1,p}) \leq \lambda(\|\hat{\Delta}_S\|_{1,p} - \|\hat{\Delta}_{\mathcal{N}}\|_{1,p}). \quad (\text{B.3})$$

Due to the convexity of  $\|\cdot\|_{2,1}$ , we know

$$\|\mathbf{X}\hat{\Delta} - \mathbf{Z}\|_{2,1} - \|\mathbf{Z}\|_{2,1} \geq \langle \mathbf{G}^0, \hat{\Delta} \rangle \geq -|\langle \mathbf{G}^0, \hat{\Delta} \rangle|. \quad (\text{B.4})$$

By the Cauchy-Schwarz inequality, we obtain

$$|\langle \mathbf{G}^0, \hat{\Delta} \rangle| \leq \|\mathbf{G}^0\|_{\infty,q} \|\hat{\Delta}\|_{1,p} \leq \frac{\lambda}{c} (\|\hat{\Delta}_S\|_{1,p} + \|\hat{\Delta}_{\mathcal{N}}\|_{1,p}), \quad (\text{B.5})$$

where the last inequality comes from the assumption  $\lambda \geq c\|\mathbf{G}^0\|_{\infty,q}$ . By combining (B.3), (B.4), and (B.5), we obtain

$$-\frac{\lambda}{c} (\|\hat{\Delta}_S\|_{1,p} + \|\hat{\Delta}_{\mathcal{N}}\|_{1,p}) \leq \lambda(\|\hat{\Delta}_S\|_{1,p} - \|\hat{\Delta}_{\mathcal{N}}\|_{1,p}). \quad (\text{B.6})$$

By rearranging (B.6), we obtain  $\|\hat{\Delta}_{\mathcal{N}}\|_{1,p} \leq (c+1)\|\hat{\Delta}_S\|_{1,p}/(c-1)$ , which completes proof.  $\square$

## B.2 Proof of Theorem 3.2

*Proof.* We first assume  $\lambda \geq c\|\mathbf{G}^0\|_{\infty,q}$ . Then we have

$$\begin{aligned} \|\mathbf{X}\hat{\Delta} - \mathbf{Z}\|_{2,1} - \|\mathbf{Z}\|_{2,1} &= \sum_{k=1}^m (\|\mathbf{X}\hat{\Delta}_{*k} - \mathbf{Z}_{*k}\|_2 - \|\mathbf{Z}_{*k}\|_2) \\ &= \sum_{k=1}^m \frac{\|\mathbf{X}\hat{\Delta}_{*k}\|_2^2 - 2(\mathbf{X}\hat{\Delta}_{*k})^T \mathbf{Z}_{*k}}{\|\mathbf{X}\hat{\Delta}_{*k} - \mathbf{Z}_{*k}\|_2 + \|\mathbf{Z}_{*k}\|_2} \geq \sum_{k=1}^m \frac{\|\mathbf{X}\hat{\Delta}_{*k}\|_2^2}{\|\mathbf{X}\hat{\Delta}_{*k}\|_2 + 2\|\mathbf{Z}_{*k}\|_2} - 2 \sum_{k=1}^m \frac{|\hat{\Delta}_{*k}^T \mathbf{X}^T \mathbf{Z}_{*k}|}{\|\mathbf{Z}_{*k}\|_2}. \end{aligned} \quad (\text{B.7})$$

Since  $\mathbf{G}_{*k}^0 = \mathbf{X}^T \mathbf{Z}_{*k} / \|\mathbf{Z}_{*k}\|_2$ , we have

$$\sum_{k=1}^m \frac{|\hat{\Delta}_{*k}^T \mathbf{X}^T \mathbf{Z}_{*k}|}{\|\mathbf{Z}_{*k}\|_2} = \sum_{k=1}^m |\hat{\Delta}_{*k}^T \mathbf{G}_{*k}^0| \leq \sum_{k=1}^m \sum_{j=1}^d |\hat{\Delta}_{jk} \mathbf{G}_{jk}^0| \leq \|\mathbf{G}^0\|_{\infty,q} \|\hat{\Delta}\|_{1,p}, \quad (\text{B.8})$$

where the last inequality follows from the Cauchy-Schwarz inequality. Recall that in the proof of Lemma 3.1, we already have (B.3) as follows,

$$\|\mathbf{X}\hat{\Delta} - \mathbf{Z}\|_{2,1} - \|\mathbf{Z}\|_{2,1} \leq \lambda (\|\hat{\Delta}_S\|_{1,p} - \|\hat{\Delta}_{\mathcal{N}}\|_{1,p}). \quad (\text{B.9})$$

Therefore by combining (B.9), (B.7), and (B.8), we obtain

$$\begin{aligned} \sum_{k=1}^m \frac{\|\mathbf{X}\hat{\Delta}_{*k}\|_2^2}{\|\mathbf{X}\hat{\Delta}_{*k}\|_2 + 2\|\mathbf{Z}_{*k}\|_2} &\leq \lambda (\|\hat{\Delta}_S\|_{1,p} - \|\hat{\Delta}_{\mathcal{N}}\|_{1,p}) + 2\|\mathbf{G}^0\|_{\infty,q} \|\hat{\Delta}\|_{1,p} \\ &\leq \lambda (1 + 2/c) \|\hat{\Delta}_S\|_{1,p} + \lambda (2/c - 1) \|\hat{\Delta}_{\mathcal{N}}\|_{1,p} \leq \frac{2\lambda}{c-1} \|\hat{\Delta}_S\|_{1,p}, \end{aligned} \quad (\text{B.10})$$

where the second inequality comes from the assumption  $\lambda \geq c\|\mathbf{G}^0\|_{\infty,q}$ , and the last inequality comes from (3.3) in Lemma 3.1. Meanwhile, by triangle inequality, we also have

$$\sum_{k=1}^m \frac{\|\mathbf{X}\hat{\Delta}_{*k}\|_2^2}{\|\mathbf{X}\hat{\Delta}_{*k}\|_2 + 2\|\mathbf{Z}_{*k}\|_2} \geq \frac{\sum_{k=1}^m \|\mathbf{X}\hat{\Delta}_{*k}\|_2^2}{\|\mathbf{X}\hat{\Delta}\|_{2,\infty} + 2\|\mathbf{Z}\|_{2,\infty}} \geq \frac{\|\mathbf{X}\hat{\Delta}\|_{\text{F}}^2}{\|\mathbf{X}\hat{\Delta}\|_{\text{F}} + 2\|\mathbf{Z}\|_{2,\infty}}, \quad (\text{B.11})$$

where the last inequality comes from the fact  $\|\mathbf{X}\hat{\Delta}\|_{2,\infty} \leq \|\mathbf{X}\hat{\Delta}\|_{\text{F}}$ . Combining (B.10) and (B.11), we obtain

$$\frac{\|\mathbf{X}\hat{\Delta}\|_{\text{F}}^2}{\|\mathbf{X}\hat{\Delta}\|_{\text{F}} + 2\|\mathbf{Z}\|_{2,\infty}} \leq \frac{2\lambda}{c-1} \|\hat{\Delta}_S\|_{1,p} \leq \frac{2\lambda\sqrt{s}\|\hat{\Delta}\|_{\text{F}}}{c-1}, \quad (\text{B.12})$$

where the last inequality comes from the fact that  $S$  contains only  $s$  rows with nonzero entries. By Assumption 3.1, we can rewrite (B.12) as

$$\|\mathbf{X}\hat{\Delta}\|_{\text{F}}^2 \leq \frac{2\lambda\sqrt{s}}{(c-1)\sqrt{n\kappa}} \|\mathbf{X}\hat{\Delta}\|_{\text{F}}^2 + \frac{4\lambda\sqrt{s}}{\sqrt{n\kappa}(c-1)} \|\mathbf{Z}\|_{2,\infty} \|\mathbf{X}\hat{\Delta}\|_{\text{F}}.$$

Given  $2\lambda\sqrt{s} \leq (c-1)\sqrt{n\kappa}/2$ , we have

$$\|\mathbf{X}\hat{\Delta}\|_{\text{F}} \leq \frac{8\lambda\sqrt{s}}{\sqrt{n\kappa}(c-1)} \|\mathbf{Z}\|_{2,\infty} \leq \frac{8\lambda\sqrt{s}\sigma_{\max}}{\sqrt{n\kappa}(c-1)} \|\mathbf{W}\|_{2,\infty}. \quad (\text{B.13})$$

By Assumption 3.1 again, we obtain

$$\|\hat{\Delta}\|_{\text{F}} \leq \frac{8\lambda\sqrt{s}\sigma_{\max}}{n\kappa^2(c-1)} \|\mathbf{W}\|_{2,\infty}. \quad (\text{B.14})$$

Now we introduce the following lemmas to deliver the concrete rates of convergence in parameter estimation.

**Lemma B.1.** Suppose that we have all entries of a random vector  $\mathbf{v} = (v_1, \dots, v_n)^T \in \mathbb{R}^n$  independently generated from the standard Gaussian distribution with mean 0 and variance 1. For any  $c_0 \in (0, 1)$ , we have

$$\mathbb{P}\left(\left|\|\mathbf{v}\|_2^2 - n\right| \geq c_0 n\right) \leq 2 \exp\left(-\frac{nc_0^2}{8}\right).$$

The proof of Lemma B.1 is provided in [9], therefore omitted.

**Lemma B.2.** Suppose that we have all entries of  $\mathbf{W}$  independently generated from the standard Gaussian distribution with mean 0 and variance 1, then we have

$$\mathbb{P}\left(\max_{1 \leq j \leq d} \frac{1}{\sqrt{n}} \|\mathbf{X}_{*j}^T \mathbf{W}\|_q \leq 2\left(m^{1-1/p} + \sqrt{\log d}\right)\right) \geq 1 - \frac{2}{d^2},$$

where  $1/p + 1/q = 1$ .

The proof of Lemma B.2 is provided in Appendix B.3. Now we proceed to derive the refined error bound for the joint sparsity setting.

Since we have all entries of  $\mathbf{W}$  independently generated from some standard Gaussian distribution with mean 0 and variance 1, then by Lemma B.1, for any  $c_0 \in (0, 1)$ , we have

$$\mathbb{P}\left(\sqrt{(1-c_0)n} \leq \|\mathbf{W}_{*k}\|_2 \leq \sqrt{(1+c_0)n}\right) \geq 1 - 2\exp\left(-\frac{nc_0^2}{8}\right).$$

By taking the union bound over all  $k = 1, \dots, m$ , we have

$$\begin{aligned} \mathbb{P}\left(\sqrt{(1-c_0)n} \leq \min_{1 \leq k \leq m} \|\mathbf{W}_{*k}\|_2 \leq \max_{1 \leq k \leq m} \|\mathbf{W}_{*k}\|_2 \leq \sqrt{(1+c_0)n}\right) \\ \geq 1 - 2m \exp\left(-\frac{nc_0^2}{8}\right). \end{aligned} \quad (\text{B.15})$$

Now conditioning on the event  $\sqrt{(1-c_0)n} \leq \min_{1 \leq k \leq m} \|\mathbf{W}_{*k}\|_2$ , we have

$$\mathcal{R}^*(\mathbf{G}^0) = \max_{1 \leq j \leq d} \left( \sum_{k=1}^n \frac{(\mathbf{W}_{*k}^T \mathbf{X}_{*j})^q}{\|\mathbf{W}_{*k}\|_2} \right)^{1/q} \leq \frac{\max_{1 \leq j \leq d} \|\mathbf{W}^T \mathbf{X}_{*j}\|_q}{\min_{1 \leq k \leq m} \|\mathbf{W}_{*k}\|_2} \leq \frac{\|\mathbf{W}^T \mathbf{X}\|_{\infty, q}}{\sqrt{(1-c_0)n}}. \quad (\text{B.16})$$

By Lemma B.2, we have

$$\mathbb{P}\left(\frac{\|\mathbf{X}^T \mathbf{W}\|_{\infty, q}}{\sqrt{(1-c_0)n}} \leq \frac{2m^{1-1/p}}{\sqrt{(1-c_0)}} + \frac{2\sqrt{\log d}}{\sqrt{(1-c_0)}}\right) \geq 1 - \frac{2}{d^2}. \quad (\text{B.17})$$

Since we requires

$$2\lambda\sqrt{s} \leq \delta(c-1)\phi(n)\kappa \text{ for some } \delta < 1, \quad (\text{B.18})$$

thus if we take

$$\lambda = \frac{2c(m^{1-1/p} + \sqrt{\log d})}{\sqrt{1-c_0}},$$

we need  $n$  to be large enough

$$\sqrt{n} \geq \frac{4c\sqrt{s}(m^{1-1/p} + \sqrt{\log d})}{\delta(c-1)\sqrt{1-c_0}\kappa},$$

such that (B.18) can be secured. Then by combining (B.15), (B.16), (B.17), and (B.14), we have

$$\begin{aligned} \mathbb{P}\left(\frac{1}{\sqrt{m}} \|\hat{\mathbf{B}} - \mathbf{B}^0\|_F \leq \frac{8c\sqrt{(1+c_0)}\sigma_{\max}}{\kappa^2(c-1)(1-\delta)\sqrt{(1-c_0)}} \left[ \sqrt{\frac{sm^{1-2/p}}{n}} + \sqrt{\frac{s \log d}{nm}} \right] \right) \\ \geq 1 - \frac{2}{d^2} - 2m \exp\left(-\frac{nc_0^2}{8}\right). \end{aligned}$$

This completes the proof.  $\square$

### B.3 Proof of Lemma B.2

*Proof.* We adopt the similar proof strategy in [17], and begin our proof by establishing the tail bound of  $\|\mathbf{W}^T \mathbf{X}_{*j}\|_q / \sqrt{n}$ .

**Deviation above the mean:** Given any pair of  $\mathbf{W}, \widetilde{\mathbf{W}} \in \mathbb{R}^{n \times m}$ , we have

$$\begin{aligned} \left| \frac{1}{\sqrt{n}} \|\mathbf{W}^T \mathbf{X}_{*j}\|_q - \frac{1}{\sqrt{n}} \|\widetilde{\mathbf{W}}^T \mathbf{X}_{*j}\|_q \right| &\leq \frac{1}{\sqrt{n}} \|(\mathbf{W} - \widetilde{\mathbf{W}})^T \mathbf{X}_{*j}\|_q \\ &= \frac{1}{\sqrt{n}} \max_{\|\boldsymbol{\theta}\|_p \leq 1} \langle \boldsymbol{\theta}, (\mathbf{W} - \widetilde{\mathbf{W}})^T \mathbf{X}_{*j} \rangle. \end{aligned} \quad (\text{B.19})$$

By the Cauchy-Schwartz inequality, we have

$$\frac{1}{\sqrt{n}} \max_{\|\boldsymbol{\theta}\|_p \leq 1} \langle \boldsymbol{\theta} \mathbf{X}_{*j}^T, \mathbf{W} - \widetilde{\mathbf{W}} \rangle \leq \frac{\|\mathbf{W} - \widetilde{\mathbf{W}}\|_F}{\sqrt{n}} \max_{\|\boldsymbol{\theta}\|_p \leq 1} \|\boldsymbol{\theta} \mathbf{X}_{*j}^T\|_F. \quad (\text{B.20})$$

Since  $\boldsymbol{\theta} \mathbf{X}_{*j}^T$  is a rank one matrix, its singular value decomposition is

$$\boldsymbol{\theta} \mathbf{X}_{*j}^T = \|\boldsymbol{\theta}\|_2 \|\mathbf{X}_{*j}\|_2 \cdot \frac{\boldsymbol{\theta}}{\|\boldsymbol{\theta}\|_2} \cdot \frac{\mathbf{X}_{*j}^T}{\|\mathbf{X}_{*j}\|_2}.$$

Consequently, we have

$$\frac{1}{n} \max_{\|\boldsymbol{\theta}\|_p \leq 1} \|\boldsymbol{\theta} \mathbf{X}_{*j}^T\|_F = \frac{\|\mathbf{X}_{*j}\|_2}{n} \max_{\|\boldsymbol{\theta}\|_p \leq 1} \|\boldsymbol{\theta}\|_2 \stackrel{(i)}{\leq} \frac{m^{1/2-1/p} \|\mathbf{X}_{*j}\|_2}{\sqrt{n}} \stackrel{(ii)}{\leq} 1. \quad (\text{B.21})$$

where (i) comes from  $\|\boldsymbol{\theta}\|_2 \leq m^{1/2-1/p} \|\boldsymbol{\theta}\|_p$ , and (ii) comes from the column normalization condition. Combining (B.19), (B.20), and (B.21), we obtain

$$\left| \frac{1}{\sqrt{n}} \|\mathbf{W}^T \mathbf{X}_{*j}\|_q - \frac{1}{\sqrt{n}} \|\widetilde{\mathbf{W}}^T \mathbf{X}_{*j}\|_q \right| \leq \|\mathbf{W} - \widetilde{\mathbf{W}}\|_F. \quad (\text{B.22})$$

which implies that  $\|\mathbf{W}^T \mathbf{X}_{*j}\|_q / \sqrt{n}$  is a Lipschitz continuous function of  $\mathbf{W}$  with a Lipschitz constant as 1. By the Gaussian concentration of measure for Lipschitz functions [10], we have

$$\mathbb{P} \left( \frac{1}{\sqrt{n}} \|\mathbf{W}^T \mathbf{X}_{*j}\|_q \geq \mathbb{E} \frac{1}{\sqrt{n}} \|\mathbf{W}^T \mathbf{X}_{*j}\|_q + \xi \right) \leq 2 \exp \left( -\frac{\xi^2}{2} \right). \quad (\text{B.23})$$

**Upper bound of the mean:** Given any  $\boldsymbol{\beta} \in \mathbb{R}^m$ , we define a zero mean Gaussian random variable  $J_{\boldsymbol{\beta}} = \boldsymbol{\beta}^T \mathbf{W}^T \mathbf{X}_{*j} / \sqrt{n}$ , and note that we have  $\frac{1}{\sqrt{n}} \|\mathbf{W}^T \mathbf{X}_{*j}\|_q = \max_{\|\boldsymbol{\beta}\|_p=1} J_{\boldsymbol{\beta}}$ . Thus given any two vectors  $\|\boldsymbol{\beta}\|_p \leq 1$  and  $\|\boldsymbol{\beta}'\|_p \leq 1$ , we have

$$\mathbb{E}(J_{\boldsymbol{\beta}} - J_{\boldsymbol{\beta}'})^2 = \frac{1}{n} \|\mathbf{X}_{*j}\|_2^2 \|\boldsymbol{\beta} - \boldsymbol{\beta}'\|_2^2 \leq \|\boldsymbol{\beta} - \boldsymbol{\beta}'\|_2^2,$$

where the last inequality comes from the column normalization condition and  $m^{1-1/p} \geq 1$ .

Then we define another Gaussian random variable  $K_{\boldsymbol{\beta}} = \boldsymbol{\beta}^T \boldsymbol{\omega}$ , where  $\boldsymbol{\omega} = (\omega_1, \dots, \omega_m)^T \sim N(\mathbf{0}, \mathbf{I}_m)$  is standard Gaussian. By construction, for any pair  $\boldsymbol{\beta}, \boldsymbol{\beta}' \in \mathbb{R}^m$ , we have

$$\mathbb{E}[(K_{\boldsymbol{\beta}} - K_{\boldsymbol{\beta}'})^2] = \|\boldsymbol{\beta} - \boldsymbol{\beta}'\|_2^2 \geq \mathbb{E}(J_{\boldsymbol{\beta}} - J_{\boldsymbol{\beta}'})^2.$$

Thus by the Sudakov-Fernique comparison principle [10], we have

$$\mathbb{E} \frac{1}{\sqrt{n}} \|\mathbf{W}^T \mathbf{X}_{*j}\|_q = \mathbb{E} \max_{\|\boldsymbol{\beta}\|_p=1} J_{\boldsymbol{\beta}} \leq \mathbb{E} \max_{\|\boldsymbol{\beta}\|_p=1} K_{\boldsymbol{\beta}}.$$

By definition of  $K_{\boldsymbol{\beta}}$ , we have

$$\mathbb{E} \max_{\|\boldsymbol{\beta}\|_p=1} K_{\boldsymbol{\beta}} = \mathbb{E} \|\boldsymbol{\omega}\|_q \leq m^{1/q} (\mathbb{E} |\omega_1|^q)^{1/q}, \quad (\text{B.24})$$

where the last inequality comes from Jensen's inequality and the fact that  $|\omega_1|^{1/q}$  is a concave function of  $\omega_1$  for  $q \in [1, 2]$ . Eventually, by Hölder inequality, we obtain

$$(\mathbb{E} |\omega_1|^q)^{1/q} \leq \sqrt{\mathbb{E} \omega_1^2} = 1. \quad (\text{B.25})$$

Combing (B.24) and (B.25), we obtain

$$\mathbb{E} \max_{\|\boldsymbol{\beta}\|_p=1} K_{\boldsymbol{\beta}} \leq m^{1-1/p} \leq 2m^{1-1/p}. \quad (\text{B.26})$$

Then combining (B.23) and (B.26), we have

$$\mathbb{P} \left( \frac{1}{\sqrt{n}} \|\mathbf{W}^T \mathbf{X}_{*j}\|_q \geq 2m^{1-1/p} + \xi \right) \leq 2 \exp \left( -\frac{\xi^2}{2} \right).$$

Taking the union bound over  $j = 1, \dots, d$  and let  $\xi = 2\sqrt{\log d}$ , we have

$$\mathbb{P} \left( \frac{1}{\sqrt{n}} \|\mathbf{X}^T \mathbf{W}\|_{\infty, q} \geq 2m^{1-1/p} + 2\sqrt{\log d} \right) \leq \frac{2}{d}.$$

This finishes the proof.  $\square$
